# Supplementary material
Source: PubMed Central journal article supplement (PMC4116060)
Supplement: ASN.2013070781_ASN2013070781SupplementaryData.pdf [file ASN.2013070781_ASN2013070781SupplementaryData.pdf]

**Supplementary materials**

**Common Variants in *UMOD* are associated with Urinary Uromodulin Levels:**

a Meta-Analysis of 10,884 Individuals from 6 cohorts

Matthias Olden<sup>\* 1,2</sup>, Tanguy Corre<sup>\* 3,4</sup>, Caroline Hayward<sup>\* 5</sup>, Daniela Toniolo<sup>6,17</sup>, Sheila Ulivi<sup>7</sup>, Paolo Gasparini<sup>8</sup>, Giorgio Pistis<sup>6</sup>, Shih-Jen Hwang<sup>1</sup>, Sven Bergmann<sup>3,4</sup>, Harry Campbell<sup>12</sup>, Massimiliano Cocca<sup>6</sup>, Ilaria Gandin<sup>8</sup>, Giorgia Giroto<sup>8</sup>, Bob Glaudemans<sup>9</sup>, Nicholas D Hastie<sup>5</sup>, Johannes Loffing<sup>10</sup>, Ozren Polasek<sup>11</sup>, Luca Rampoldi<sup>12</sup>, Igor Rudan<sup>13</sup>, Cinzia Sala<sup>6</sup>, Michela Traglia<sup>6</sup>, Peter Vollenweider<sup>14</sup>, Dragana Vuckovic<sup>8</sup>, Sonia Youhanna<sup>9</sup>, Julien Weber<sup>9</sup>, Alan F Wright<sup>5</sup>, Zoltán Kutalik<sup>#3,4,15</sup>, Murielle Bochud<sup># 15</sup>, Caroline S. Fox<sup># 1,16</sup>, Olivier Devuyst<sup># 9</sup>.

\* MO, TC and CH jointly contributed.

# ZK, MB, CSF and OD jointly oversaw the work.

**Supplementary Tables 1 to 5**

**Supplementary Table 1 . Mouse primers used in real-time RT-PCR analyses.**

| <b>Gene (Protein)</b>  | <b>Forward primer (5'-3')</b> | <b>Reverse primer (5'-3')</b> | <b>PCR<br/>Product (bp)</b> | <b>Efficiency</b> |
|------------------------|-------------------------------|-------------------------------|-----------------------------|-------------------|
| <i>Slc38a3</i> (SNAT3) | GTT ATC TTC GCC CCC AAC AT    | TGG GCA TGA TTC GGA AGT AG    | 109                         | 0.97 ± 0.03       |
| <i>Slc5a2</i> (SGLT2)  | TTG GGC ATC ACC ATG ATT TA    | GCT CCC AGG TAT TTG TCG AA    | 164                         | 1.02 ± 0.03       |
| <i>Nphs2</i> (Podocin) | GTC TAG CCC ATG TGT CCA AA    | CCA CTT TGA TGC CCC AAA TA    | 162                         | 1.03 ± 0.03       |
| <i>Slc12a3</i> (NCC)   | TTT TCT GGA CCA CCA TCT CC    | GTG AAG TTC CAG CCA TAG CC    | 148                         | 1.01 ± 0.02       |
| <i>Aqp2</i> (AQP2)     | TGA GCC TCA AGA AGG GTC TC    | TCT CCA GAG CTC TCC GTC TC    | 142                         | 0.98 ± 0.03       |
| <i>Umod</i> (UMOD)     | TTG CGA AGA ATG CAG GGT AG    | TGG CAC TTT CTG AGG GAC AT    | 156                         | 1.01 ± 0.02       |
| <i>Kcnj1</i> (ROMK)    | CCG TGT TCA TCA CAG CCT TCT T | CCG TAA CCT ATG GTC ACT TGG G | 190                         | 1.03 ± 0.03       |
| <i>Sor11</i> (SORL1)   | CAG CCT ATC CAG GTG TAT GGA   | CTA ATG CCA CGA TCA CGT TG    | 100                         | 0.99 ± 0.02       |
| <i>Cab39</i> (CAB39)   | GTG AGC TGC TGT TGG ACA GA    | CCA CAA ACA CCT TGA ACA CG    | 146                         | 1.01 ± 0.03       |
| <i>Gapdh</i> (GAPDH)   | TGC ACC ACC AAC TGC TTA GC    | GGA TGC AGG GAT GGG GGA GA    | 176                         | 1.04 ± 0.03       |

The primers were designed using Beacon Design 2.0 (Premier Biosoft International, Palo Alto, CA).

**Supplementary Table 2: Uromodulin assay and urine samples processing.**

| <b>Study</b>            | <b>Mode of urine collection</b> | <b>Assay name, specifications</b>   | <b>Lower detection limit (ng/mL)</b> | <b>No of unindexed uromodulin below lower detection limit</b> | <b>Upper detection limit (ng/mL)</b> | <b>No of unindexed uromodulin above upper detection limit (N)</b> | <b>Interval between collection and freezing (Minutes)</b> | <b>Temperature at which the samples were stored (°C)</b> | <b>Collection of samples</b> | <b>No thawing before assay (N)</b> |
|-------------------------|---------------------------------|-------------------------------------|--------------------------------------|---------------------------------------------------------------|--------------------------------------|-------------------------------------------------------------------|-----------------------------------------------------------|----------------------------------------------------------|------------------------------|------------------------------------|
| <b>COLAUS</b>           | Morning urine sample            | In-house UMOD ELISA                 | 3.9                                  | 0                                                             | 500                                  | 0                                                                 | 60-90                                                     | -80°C                                                    | 2003 to 2006                 | None                               |
| <b>CROATIA-Korcula</b>  | Morning urine sample            | In-house UMOD ELISA                 | 3.9                                  | 0                                                             | 500                                  | 0                                                                 | ~30                                                       | -70C                                                     | 2008 to 2010                 | None                               |
| <b>CROATIA-Split</b>    | Morning urine sample            | In-house UMOD ELISA                 | 3.9                                  | 0                                                             | 500                                  | 0                                                                 | ~30                                                       | -70C                                                     | 2008 to 2010                 | None                               |
| <b>FHS</b>              | Morning urine sample            | Rule Based Medicine multiplex array | 6.2                                  | 61                                                            | 135                                  | 3                                                                 | 120                                                       | -80°C                                                    | 1995 to 1998                 | Once                               |
| <b>INGI-Carlantino</b>  | Morning urine sample            | In-house UMOD ELISA                 | 3.9                                  | 0                                                             | 500                                  | 0                                                                 | ~5                                                        | -20°C                                                    | 2005                         | Twice                              |
| <b>INGI-Val Borbera</b> | Morning urine sample            | In-house UMOD ELISA                 | 3.9                                  | 0                                                             | 500                                  | 0                                                                 | ~120                                                      | -20°C for 1-4 weeks; then -80°C                          | 2005 to 2008                 | None                               |

**Supplementary Table 3: Genotyping and imputation platforms.**

| Study            | Array type                                                          | Genotype calling | QC filters for genotyped SNPs used for imputation                                                                                        | # SNPs used for imputation | Imputation    | Imputation Backbone for phased CEU haplotypes (NCBI build) | Filtering of imputed genotypes   | Data management and statistical analysis |
|------------------|---------------------------------------------------------------------|------------------|------------------------------------------------------------------------------------------------------------------------------------------|----------------------------|---------------|------------------------------------------------------------|----------------------------------|------------------------------------------|
| COLAUS           | Affymetrix 500K                                                     | BRLMM            | call rate <70%, MAF <1%, pWE <1E-7                                                                                                       | 390631                     | IMPUTE v0.2.0 | HapMap release 21 (build 35)                               | none                             | Matlab                                   |
| Croatia-KORCULA  | Illumina 370CNV                                                     | GenomeStudio     | HWEp<1e-6, callrate<98%, MAF<0.01                                                                                                        | 307625                     | MACH v1.0.16  | phased CEU haplotypes, HapMap release 22 (build 36)        | none                             | GenABEL, ProbABEL                        |
| Croatia-SPLIT    | Illumina 370CNV                                                     | GenomeStudio     | HWEp<1e-6, callrate<98%, MAF<0.01                                                                                                        | 321456                     | MACH v1.0.16  | phased CEU haplotypes, HapMap release 22 (build 36)        | none                             | GenABEL, ProbABEL                        |
| FHS              | Affymetrix 500K mapping array and Affymetrix 50K supplemental array | Affymetrix       | HWEp<1e-6, callrate<97%, Mishapp<1e-9, MAF<0.01, Mendelian errors>100, SNPs not in Hapmap or with strand issues when merging with Hapmap | 378,163                    | MACH v1.0.15  | phased CEU haplotypes, HapMap release 22 (build 36)        | none                             | R, SAS                                   |
| INGI- Carlantino | Illumina HH 370 CNV                                                 | Bead Studio      | HWEp<1e-6, callrate<95%, MAF<0.01,                                                                                                       | 285,569                    | Mach1         | phased CEU haplotypes, HapMap release 22 (build 36)        | RSQ < 0.3                        | R<br>GenABEL/ProbABEL                    |
| INGI-Val Borbera | Illumina SNP array 370K - HumanCNV370-Quadv3                        | BeadStudio       | Sample Call Rate >95%, SNP Call Rate >90%, HWE P-value >10-4, MAF>0.01%,                                                                 | 324,319                    | MACH v1.0.15  | release 22 (build 36)                                      | MAF < 0.01, r <sup>2</sup> < 0.3 | R,<br>GenABEL/ProbABEL                   |

**Supplementary Table 4: Top loci with p-values up to 1e-7 associated with raw (unindexed to urinary creatinine) urinary uromodulin in the overall population.**

| SNP ID     | Chr | Reference allele | Non-reference allele | Effect size | p-value * | Reference allele frequency | Nearest Gene | Median Imputation Quality Across Participating Studies | eGFRcrea direction relative to reference allele | eGFRcrea p-value | R <sup>2</sup> to top SNP rs12917707 |
|------------|-----|------------------|----------------------|-------------|-----------|----------------------------|--------------|--------------------------------------------------------|-------------------------------------------------|------------------|--------------------------------------|
| rs12917707 | 16  | T                | G                    | -0.29       | 1.7E-56   | 0.1786                     | <i>UMOD</i>  | 0.94                                                   | +                                               | 1.20E-20         | same snp                             |
| rs12446492 | 16  | A                | T                    | -0.12       | 7.0E-17   | 0.4487                     | <i>PDILT</i> | 0.72                                                   | +                                               | 6.90E-07         | 0.16                                 |
| rs4238595  | 16  | T                | C                    | -0.11       | 1.7E-09   | 0.2906                     | <i>UMOD</i>  | 0.90                                                   | +                                               | 0.15             | 0.05                                 |
| rs11641045 | 16  | A                | G                    | -0.13       | 3.6E-10   | 0.8793                     | <i>UMOD</i>  | 0.99                                                   | +                                               | 0.00048          | 0.03                                 |

\* P-value from inverse-variance meta-analysis, corrected for genomic control. Sample size weighted meta-analysis yielded similar results.

Note: Genes nearby were based on RefSeq genes (build 36). The gene closest to the SNP is listed first and is marked bold if the SNP is located within the gene. Effects and p-values from inverse-variance meta-analysis were consistent with the sample-size weighted results.

**Supplementary Table 5: VEGAS analysis for loci associated with urinary uromodulin indexed to urinary creatinine in the overall population.**

| Chr | Nearest Gene    | nSNPs | Simulations | Start position | Stop position | Test statistic | VEGAS Pvalue | SNP        | SNP-pvalue | EGFR Pvalue    |
|-----|-----------------|-------|-------------|----------------|---------------|----------------|--------------|------------|------------|----------------|
| 16  | <i>UMOD</i>     | 120   | 1.00E+06    | 20251873       | 20271538      | 6827.690262    | 0            | rs12917707 | 7.85E-73   | 1.2E-20        |
| 16  | <i>PDILT</i>    | 127   | 1.00E+06    | 20277992       | 20323534      | 6852.990812    | 0            | rs12917707 | 7.85E-73   | 1.2E-20        |
| 16  | <i>GP2</i>      | 129   | 1.00E+06    | 20229311       | 20246336      | 5482.984445    | 0            | rs12917707 | 7.85E-73   | 1.2E-20        |
| 16  | <i>ACSM5</i>    | 110   | 1.00E+06    | 20328356       | 20359782      | 2827.046129    | 0            | rs11864909 | 1.02E-41   | 1.0E-12        |
| 8   | <i>C8orf76</i>  | 66    | 1.00E+06    | 124301411      | 124322798     | 558.5728862    | 8.00E-06     | rs4377946  | 9.46E-07   | 0.58           |
| 1   | <i>TDRD5</i>    | 212   | 1.00E+06    | 177827647      | 177927021     | 1138.352998    | 0.000118     | rs12039153 | 1.54E-05   | 0.58           |
| 8   | <i>FAM83A</i>   | 112   | 1.00E+06    | 124263932      | 124291499     | 713.532712     | 0.000165     | rs4377946  | 9.46E-07   | 0.58           |
| 6   | <i>SESN1</i>    | 135   | 1.00E+06    | 109414337      | 109521970     | 1138.513874    | 0.000171     | rs3734649  | 8.63E-05   | 0.93           |
| 8   | <i>WDR67</i>    | 203   | 1.00E+06    | 124154100      | 124233571     | 1007.030324    | 0.000178     | rs4377946  | 9.46E-07   | 0.25           |
| 20  | <i>STK35</i>    | 203   | 1.00E+06    | 2031518        | 2077198       | 928.9085244    | 0.00047      | rs6046998  | 0.0001195  | 0.19           |
| 2   | <i>DUSP11</i>   | 48    | 1.00E+06    | 73842836       | 73860730      | 460.5605177    | 0.000671     | rs10203740 | 0.0004001  | 0.72           |
| 1   | <i>ATAD3C</i>   | 6     | 1.00E+06    | 1374931        | 1395401       | 48.45550841    | 0.000687     | rs6690515  | 0.0001865  | <b>0.00029</b> |
| 1   | <i>ATAD3B</i>   | 15    | 1.00E+06    | 1397026        | 1421445       | 105.386289     | 0.000835     | rs6690515  | 0.0001865  | <b>0.00029</b> |
| 2   | <i>FLJ43987</i> | 51    | 1.00E+06    | 73864823       | 73897782      | 276.6775208    | 0.000854     | rs10203740 | 0.0004001  | 0.00029        |

The table is sorted by SNP and VEGAS P-value, with significant results highlighted in bold.

Results shown for sample size weighted meta-analysis results. Inverse-variance meta-analysis yielded similar results.
